# Supplementary material for: Silencing alanine transaminase 2 in diabetic liver attenuates hyperglycemia by reducing gluconeogenesis from amino acids
Source: PubMed Central journal article supplement — Cell Rep. Author manuscript; Available in PMC 2022 May 20. (PMC9121396; doi:10.1016/j.celrep.2022.110733), 2022-04-26

**Supplemental information**

**Silencing alanine transaminase 2 in diabetic liver  
attenuates hyperglycemia by reducing  
gluconeogenesis from amino acids**

**Michael R. Martino, Manuel Gutiérrez-Aguilar, Nicole K.H. Yiew, Andrew J. Lutkewitte, Jason M. Singer, Kyle S. McCommis, Daniel Ferguson, Kim H.H. Liss, Jun Yoshino, M. Katie Renkemeyer, Gordon I. Smith, Kevin Cho, Justin A. Fletcher, Samuel Klein, Gary J. Patti, Shawn C. Burgess, and Brian N. Finck**

**Supplemental Table 1. Subject characteristics** *Related to Figure 1.*

|                                      | <b>Pre-surgery</b> | <b>Post-surgery</b> |
|--------------------------------------|--------------------|---------------------|
| <b>BMI (kg/m<sup>2</sup>)</b>        | 57 ± 10            | 36 ± 7*             |
| <b>Change in BMI (%)</b>             | -                  | -36 ± 4             |
| <b>Basal glucose (mg/dL)</b>         | 121 ± 55           | 87 ± 8*             |
| <b>Basal insulin (mU/L)</b>          | 17 ± 10            | 4 ± 1*              |
| <b>HOMA-IR</b>                       | 4.2 ± 2.2          | 0.8 ± 0.3*          |
| <b>HISI (1000/(μmol/min x mU/L))</b> | 0.08 ± 0.04        | 0.28 ± 0.11*        |
| <b>Change in HISI (%)</b>            | -                  | 500 ± 295           |

\*p&lt;0.05 versus Pre-surgery.

**Supplemental Table 2. Plasma amino acid concentrations (μM)** *Related to Figure 6.*

|                      | <b>db/+<br/>shLacZ</b> | <b>db/+<br/>shGpt2</b>  | <b>db/db<br/>shLacZ</b>  | <b>db/db<br/>shGpt2</b>   |
|----------------------|------------------------|-------------------------|--------------------------|---------------------------|
| <b>threonine</b>     | 130.6 ± 17.3           | 149.4 ± 16.5            | 122.8 ± 8.7              | 137.2 ± 19.1              |
| <b>methionine</b>    | 62.6 ± 6.2             | 68.2 ± 4.7              | 55.9 ± 3.2               | 51.6 ± 3.6 <sup>b</sup>   |
| <b>lysine</b>        | 241.9 ± 17.0           | 249.4 ± 16.2            | 245.1 ± 18.0             | 248.9 ± 36.4              |
| <b>histidine</b>     | 55.5 ± 3.4             | 58.5 ± 2.9              | 67.9 ± 2.9 <sup>a</sup>  | 84.0 ± 12.2 <sup>a</sup>  |
| <b>phenylalanine</b> | 78.3 ± 4.3             | 86.6 ± 2.7              | 111.2 ± 2.7 <sup>a</sup> | 118.8 ± 9.0 <sup>a</sup>  |
| <b>tyrosine</b>      | 90.6 ± 8.4             | 96.5 ± 7.0              | 87.8 ± 2.4               | 92.3 ± 14.7               |
| <b>serine</b>        | 116.8 ± 7.0            | 133.8 ± 7.4             | 108.7 ± 5.8              | 118.6 ± 15.9              |
| <b>glutamine</b>     | 435.9 ± 24.6           | 467.4 ± 9.1             | 411.5 ± 45.9             | 404.1 ± 20.9 <sup>b</sup> |
| <b>proline</b>       | 79.3 ± 7.2             | 93.6 ± 6.5              | 79.8 ± 6.9               | 88.3 ± 11.5               |
| <b>ornithine</b>     | 51.6 ± 5.9             | 77.0 ± 9.1 <sup>c</sup> | 70.1 ± 2.6 <sup>a</sup>  | 85.5 ± 3.5 <sup>ac</sup>  |
| <b>aspartate</b>     | 25.0 ± 1.4             | 28.4 ± 1.0              | 23.3 ± 0.9               | 26.3 ± 3.6                |
| <b>asparagine</b>    | 45.3 ± 5.2             | 61.8 ± 6.5              | 41.5 ± 4.1               | 50.2 ± 7.2                |
| <b>citrulline</b>    | 50.6 ± 4.0             | 53.5 ± 3.5              | 57.2 ± 5.4               | 63.0 ± 6.1                |

<sup>a</sup>p<0.05 versus db/+ shLacZ mice.<sup>b</sup>p<0.05 versus db/+ shGpt2.<sup>c</sup>p<0.05 versus shLacZ mice of the same genotype.

**Supplemental Table 3. Human Primer Sequences for Real-Time Quantitative PCR Related to STAR Methods.**

| <b>Gene</b>            | <b>Forward</b>          | <b>Reverse</b>           |
|------------------------|-------------------------|--------------------------|
| <b><i>RPLP0</i></b>    | GTGATGTGCAGCTGATCAAGACT | GATGACCAGCCCAAAGGAGA     |
| <b><i>GPT2</i></b>     | GTGATGGCACTATGCACCTAC   | TTCACGGATGCAGTTGACACC    |
| <b><i>GPT</i></b>      | CAAGAAGGTGCTCATGGAGATGG | TGTTCAACCACCTCCACATAGC   |
| <b><i>SFXN</i></b>     | TTAACATCAAGGAACCTCGATGG | TGGGGTCAGTTACAGTGAAGA    |
| <b><i>SLC25A2</i></b>  | GGGACAGCGTGTGTACTGAC    | ACTTGGGCGTATGTCTTCAGG    |
| <b><i>SLC25A39</i></b> | TCGTGAAGATCGTGAGGCAC    | GGCTCGACCACACAGGAAG      |
| <b><i>SLC25A18</i></b> | CTCATCAATGGAGGTGTAGCAG  | GAGCCGTCTTCATCAGGCA      |
| <b><i>SLC25A38</i></b> | ATGATTCAGAACTCACGTCCGT  | CAGGCGTGTTTTAAGGAGATCC   |
| <b><i>SLC25A40</i></b> | ATTAGACTCCAAGCCCAAACAA  | GGAAGGCCACTCCATAGAGATT   |
| <b><i>ASNS</i></b>     | CAGCGGGGACCCAATAGTAG    | GTGTAGGACGTGAGCAGAAAA    |
| <b><i>FGF21</i></b>    | ACCAGAGCCCCGAAAGTCT     | CTTGACTCCCAAGATTTGAATAAC |
| <b><i>TRIB3</i></b>    | AAGCGGTTGGAGTTGGATGAC   | CACGATCTGGAGCAGTAGGTG    |
| <b><i>DDIT4</i></b>    | TGAGGATGAACACTTGTGTGC   | CCAACTGGCTAGGCATCAGC     |
| <b><i>PSAT1</i></b>    | TGCCGCACTCAGTGTTGTTAG   | GCAATTCCCGCACAAAGATTCT   |

**Supplemental Table 4. Mouse Primer Sequences for Real-Time Quantitative PCR Related to STAR Methods.**

| <b>Gene</b>     | <b>Forward</b>             | <b>Reverse</b>             |
|-----------------|----------------------------|----------------------------|
| <i>Rplp0</i>    | GCAGACAACGTGGGCTCCAAGCAGAT | GGTCCTCCTTGGTGAACACGAAGCCC |
| <i>Gpt</i>      | AGCCTTTTACTGAGGTTATCCGT    | TCAGAAGATTGGGGTAGACACA     |
| <i>Gpt2</i>     | GAGGTAATCCGAGCCAACATTG     | GGTTTGGGTAGGTGCAGAGTG      |
| <i>Atf4</i>     | CGAGTTAAGCACATTCTGGAATC    | TTCGCTGTTT CAGGAAGCTCAT    |
| <i>Sfxn1</i>    | GTGCCACCCAACATTAACATCA     | ACCACTTTCTCGCATTCTCTA      |
| <i>Slc25a2</i>  | GTGGCCTTTACAGGGGAACC       | TTCCTGACAAACTGTTGGCAA      |
| <i>Slc25a39</i> | CTCGGCAACCAGCGAATTG        | CCATTGCAGTATAGGAGGCACT     |
| <i>Slc25a18</i> | ATCTCCGCAAACTCATCAATGG     | GGTTCTGTAGTCGGGTCTTGG      |
| <i>Slc25a38</i> | TCCCCAGTGATCGAGAAGG        | CTGGAAGAGGAGCGTGGAAC       |
| <i>Slca2540</i> | TGGTGACTCCCCTGGATGTT       | ATGTCCCACGGAAGTTTCCTG      |
| <i>Asns1</i>    | GTTTGGGAAAAGGTAGACCTCAC    | TTGTATGGCTCGTTTTGGCAG      |
| <i>Fgf21</i>    | GTGTCAAAGCCTCTAGGTTTCTT    | GGTACACATTGTAACCGTCCTC     |
| <i>Trib3</i>    | TGCAGGAAGAAACCGTTGGAG      | CTCGTTTTAGGACTGGACACTTG    |
| <i>Ddit4</i>    | CAAGGCAAGAGCTGCCATAG       | CCGGTACTTAGCGTCAGGG        |
| <i>Psat1</i>    | CAGTGGAGCGCCAGAATAGAA      | CCTGTGCCCTTCAAGGAG         |
| <i>Pck1</i>     | GGGTGCAGAATCTCGAGTTG       | CACCATCACCTCCTGGAAGA       |
| <i>Mpc1</i>     | GACTTTCGCCCTCTGTTGCTA      | GAGGTTGTACCTTGTAGGCAAAT    |
| <i>Mpc2</i>     | ACCTACCACCGACTCATGGAT      | TGTAAAGCGGCCTCAATTTCT      |
| <i>Gdh1</i>     | TAAGATCAACCCCAAGAACTATACA  | ATAGTGCCCTATGGTGCTGGCATAG  |
| <i>Got1</i>     | ACCAATCTACGTATCATCACCAA    | TGGAGGACAAAGATGGAGAACTC    |

## Supplemental Figure Legends

**Supplementary Figure 1. *Gpt2* expression is regulated by obesity and ATF4.** *Related to Figure 3.* (A) mRNA expression of *Gpt* and other genes encoding amino acid transporters in diet-induced obese mice. (B) mRNA expression of *Gpt* and ATF4-target genes following ATF4 overexpression or knockdown in *db/db* mice. (C) Gene expression in hepatocytes isolated from lean C57BL/6J mice treated with 1  $\mu$ l (low; n=3) or 5  $\mu$ l (high; n=3) of an adenovirus overexpressing ATF4 or 5  $\mu$ l of an adenovirus overexpressing  $\beta$ -gal (n=3). Data are presented as mean  $\pm$  SEM. \* indicates  $p < 0.05$ .

**Supplemental Figure 2. Loss of ALT2 does not affect glutamine metabolism in isolated hepatocytes.** *Related to Figure 4.* (A) Intracellular citrate and  $\alpha$ -ketoglutarate (aKG) enrichment from  $^{13}\text{C}$ -glutamine is shown. A representative experiment performed in triplicate is shown. (B) Media glucose enrichment from  $^{13}\text{C}$ -glutamine is shown. (C) Blood glucose area under the curve during ATT, QTT, and PTT in lean WT or LS-*Gpt2*<sup>-/-</sup> mice. Data are presented as mean  $\pm$  SEM.

**Supplementary Figure 3. Loss of ALT2 in the livers of lean mice does not affect plasma organic and amino acids levels.** *Related to Figure 5.* Plasma (A) organic acids and (B) amino acids from fed and fasted LS-*Gpt2*<sup>-/-</sup> and WT mice measured by mass spectrometry. Data analysis and quantification involved comparisons of individual ion peaks to that of the internal standard for each amino or organic acid. Data is presented as box and whisker plots with the whiskers indicating minimum and maximum values, the bottom of the box as the lower quartile, the line bisecting the box as the median, and the top of the box as the upper quartile.

**Supplementary Figure 4. Characterization of blood and plasma parameters in fed and fasted LS-*Gpt2*<sup>-/-</sup> mice.** *Related to Figure 5.* LS-*Gpt2*<sup>-/-</sup> and fl/fl mice were either given ad libitum access to food or fasted for 18h. Graphs depict plasma concentrations of (A) insulin, (B-C) lipids, (D) total ketone bodies, (E) glycerol, and (F) amino acids. Data are presented as mean  $\pm$  SEM. \*indicates  $p < 0.05$ .

**Supplementary Figure 5. Effect of hepatic loss of ALT2 on gene expression of potential compensatory pathways in fed and fasted conditions.** *Related to Figure 5.* mRNA expression of liver (A) *Gpt*, (B) mitochondrial pyruvate carriers (*Mpc1* and *Mpc2*), (C) *Pck1* (gluconeogenic), (D) glutamate/glutamine metabolism-related genes, (E) mitochondrial amino acid transporters. Data generated by qPCR are presented as arbitrary units (AU) while data generated by RNA-seq is expressed as counts per million (cpm). Data is presented as mean  $\pm$  SEM. \*indicates  $p < 0.05$ .

**Supplemental Figure 6. Liver amino acid transporter expression and plasma organic acids in *db/db* mice after shRNA treatment.** *Related to Figure 6.* (A) mRNA expression of mitochondrial amino acid transporters in livers collected from *db/db* mice after a 5h fast. Data are presented as mean  $\pm$  SEM. \* $p < 0.05$ . (B) Plasma organic acid concentrations in *db/+* or *db/db* mice 7 days after administration of adenovirus expressing shRNA against *LacZ* or *Gpt2*. Plasma was collected at sacrifice after a 4 h fast (n=4-5 per group). \* $p < 0.05$  versus *shLacZ* mice of the same genotype.

**Supplemental Figure 7. Plasma lipids, insulin-stimulated AKT phosphorylation, and liver mitochondrial amino acid transporters are not affected by *Gpt2* knockdown in *db/db* mice.** *Related to Figure 7.* (A) Plasma triglyceride and cholesterol concentrations 7 days after

administration of adenovirus expressing shRNA against *LacZ* or *Gpt2*. Plasma was collected at sacrifice after a 4 h fast (n=7-8 per group). **(B)** Densitometric quantification of blots in Figure 7E from *db/db* mice 7 days after administration of adenovirus expressing shRNA against *LacZ* or *Gpt2*.

# Supplemental Figure 1

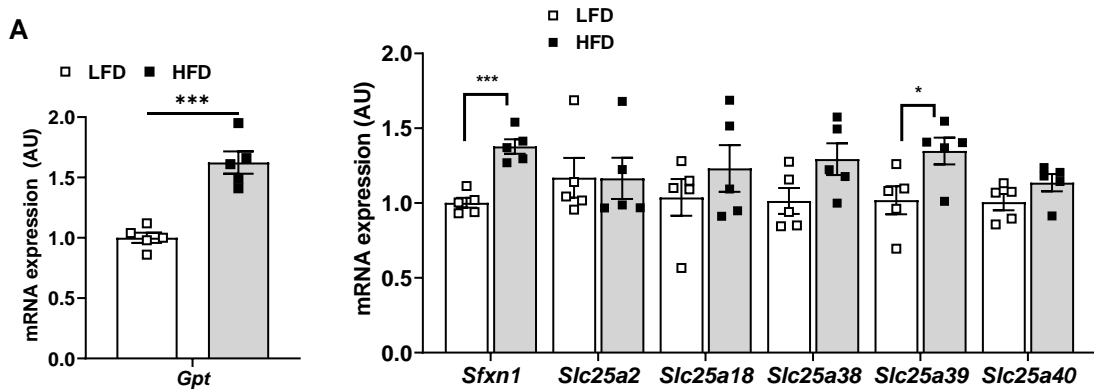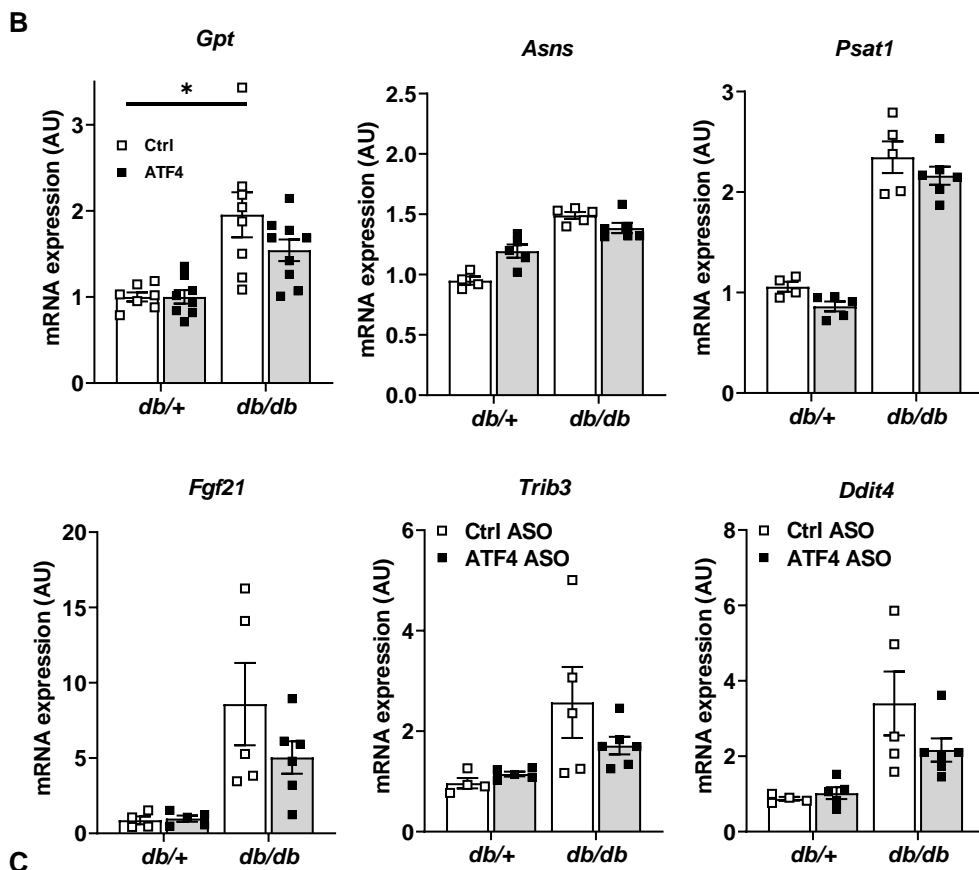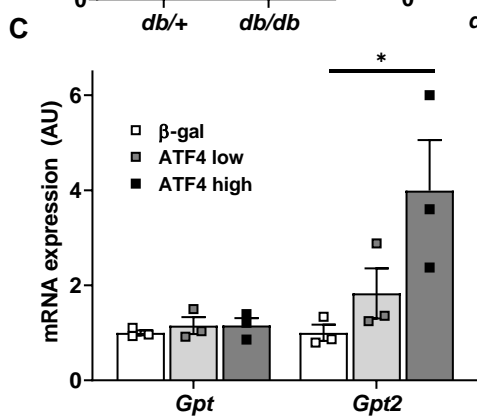



# Supplemental Figure 2

**A**

cell citrate enrichment  
from  $^{13}\text{C}$ -glutamine

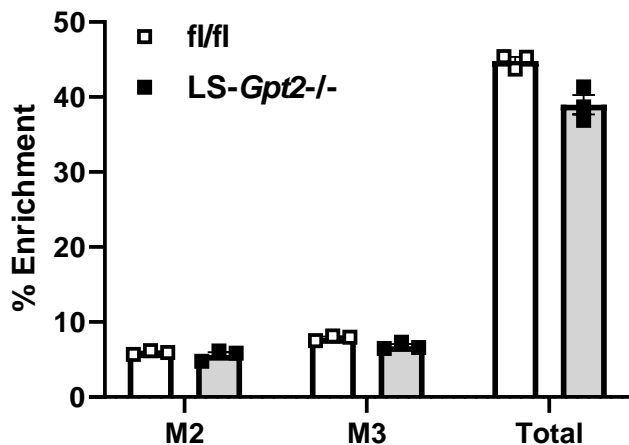

cell aKG enrichment  
from  $^{13}\text{C}$ -glutamine

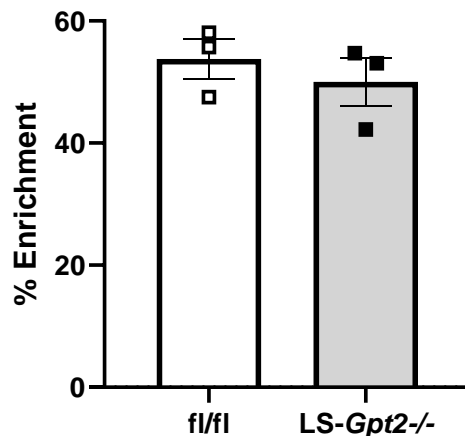

**B**

media glucose enrichment  
from  $^{13}\text{C}$ -glutamine

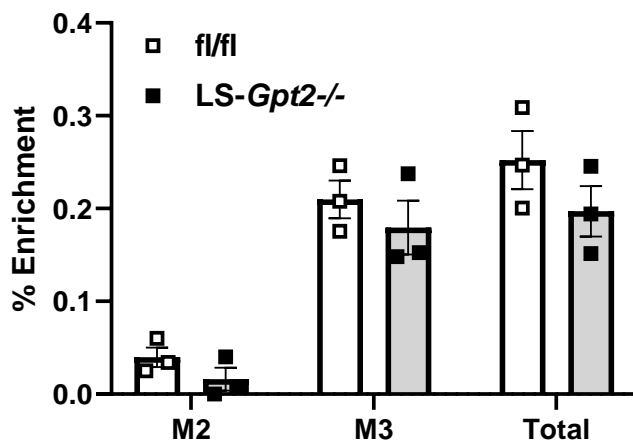

**C**

ATT

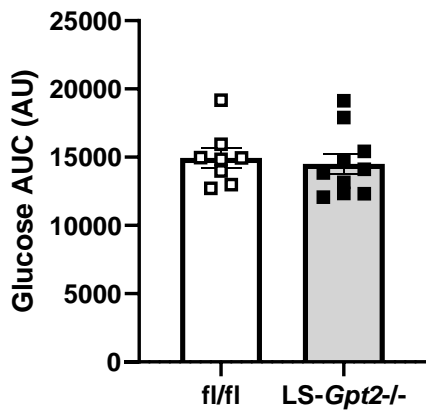

PTT

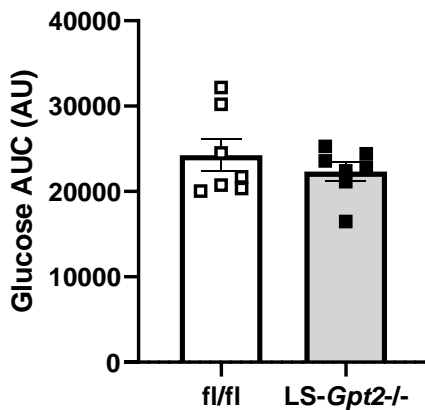

QTT

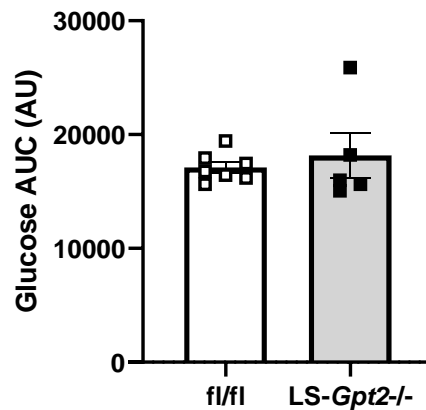

# Supplemental Figure 3

**A**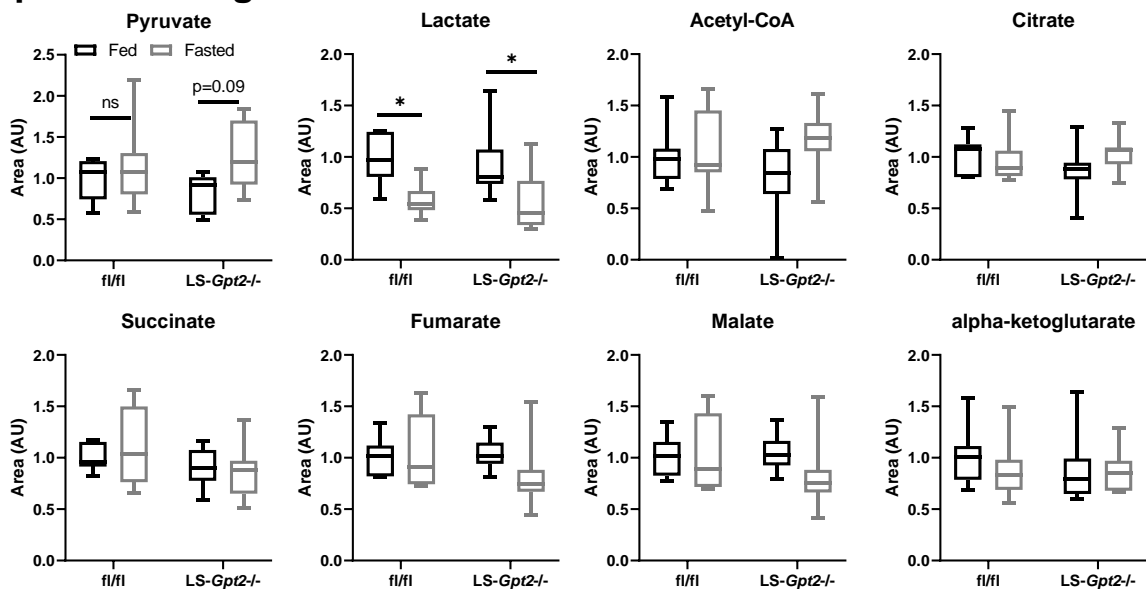**B**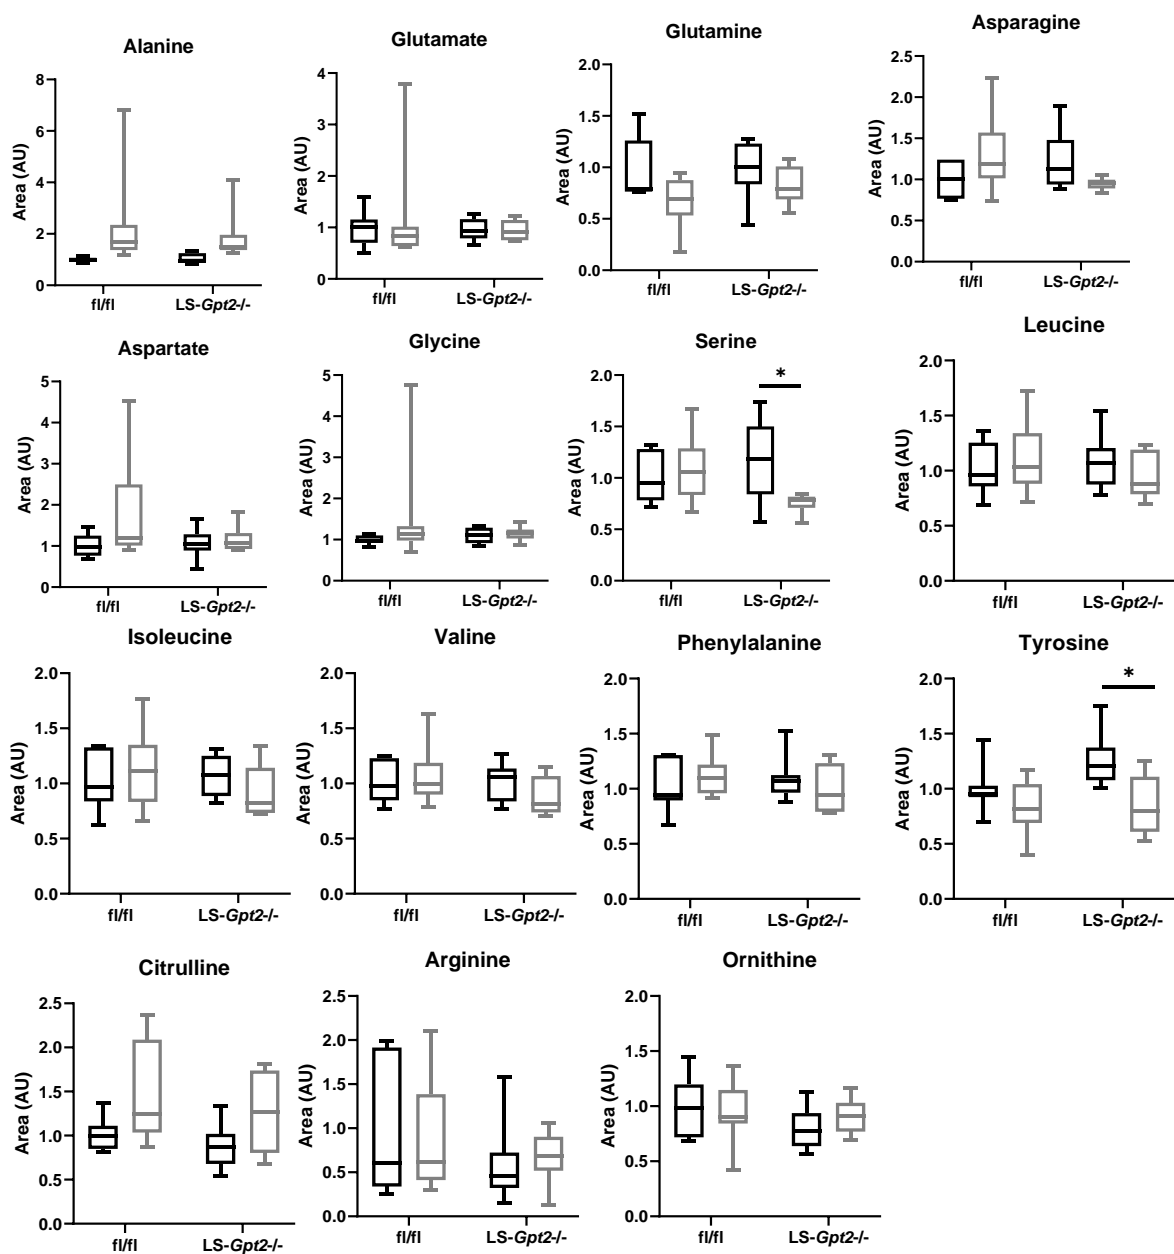

# Supplemental Figure 4

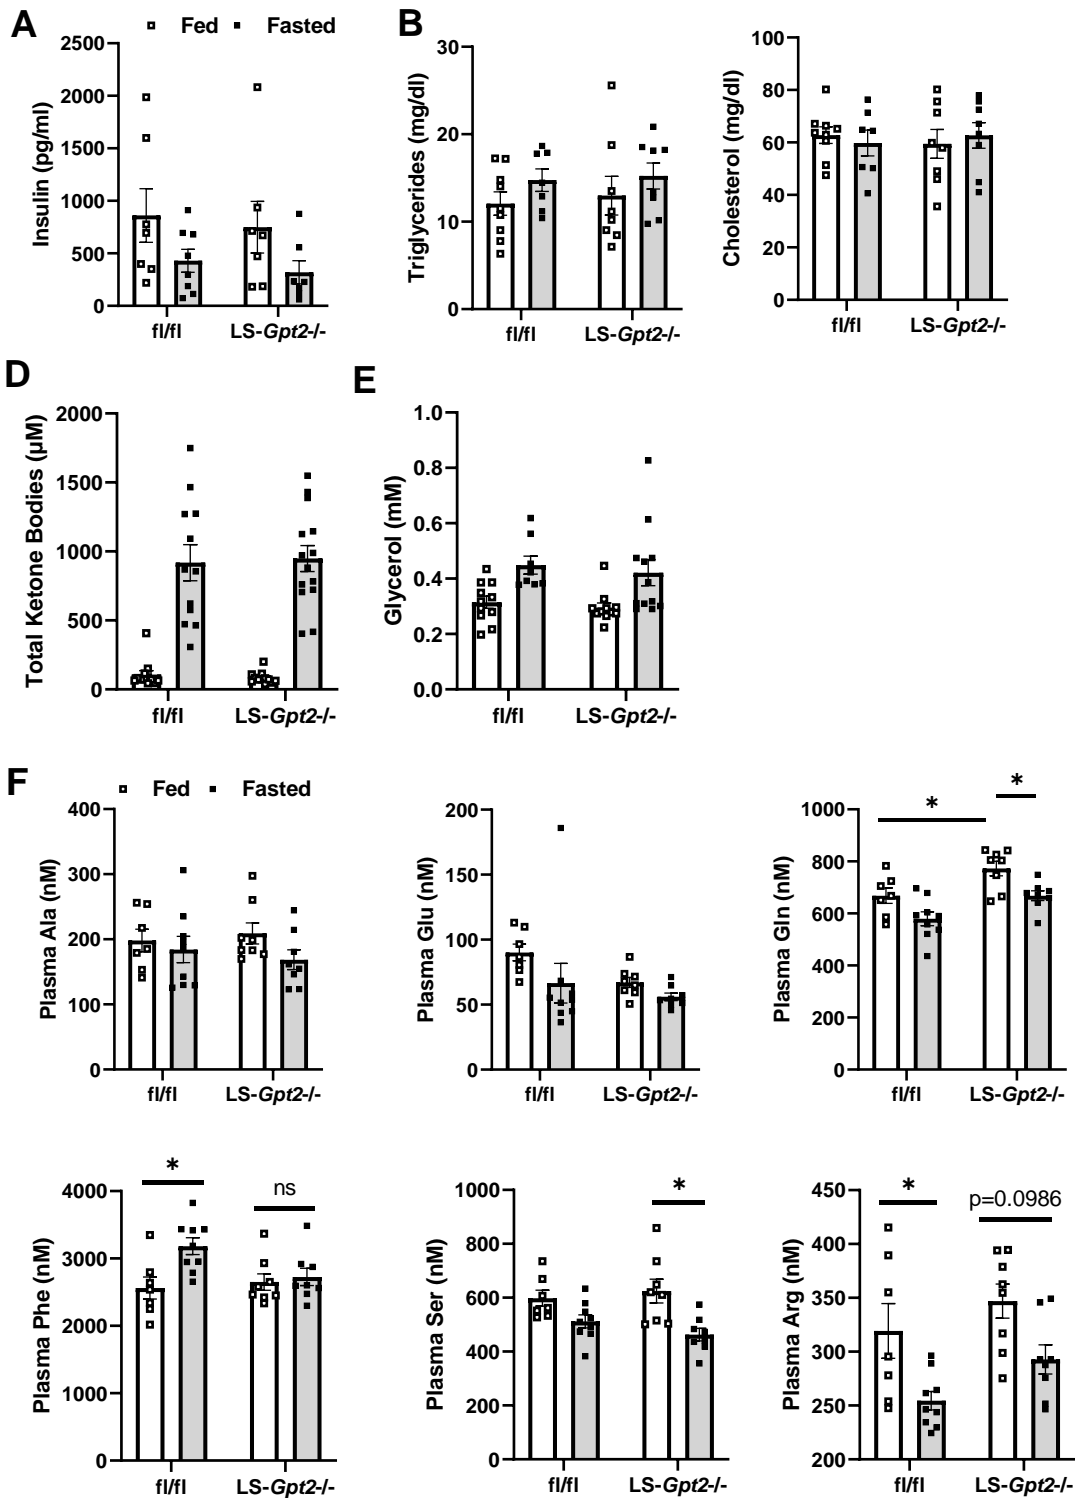

# Supplemental Figure 5

**A**

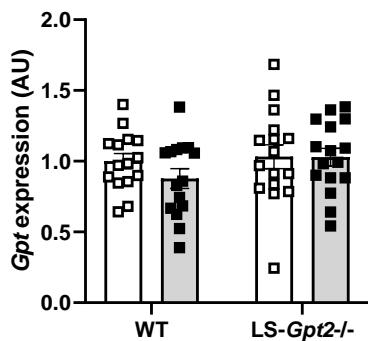

**B**

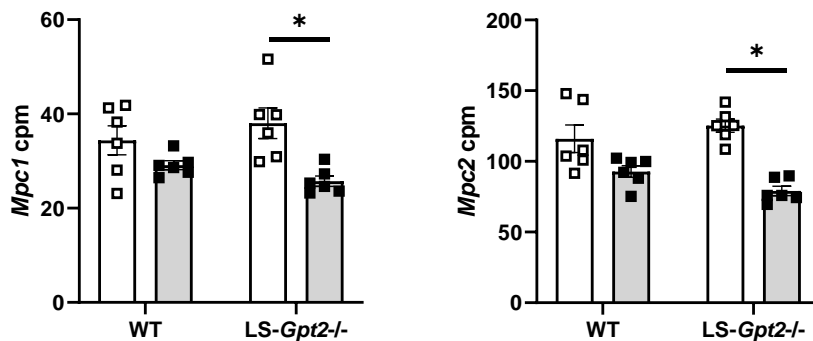

**C**

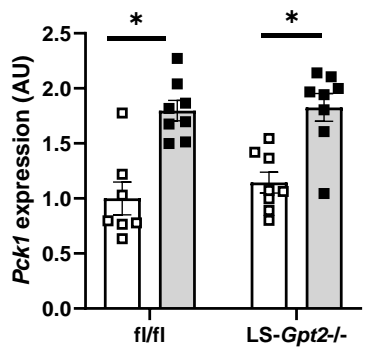

**D**

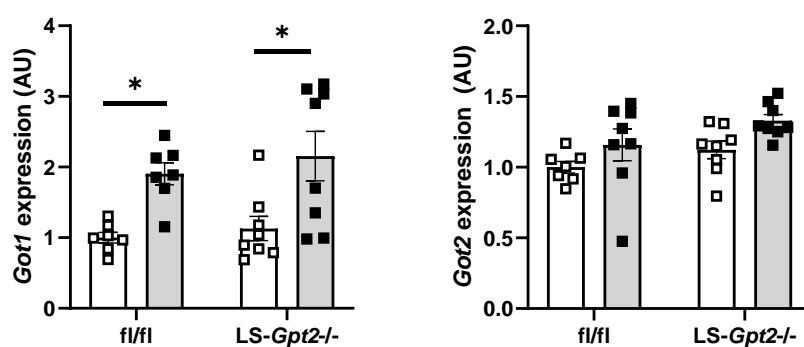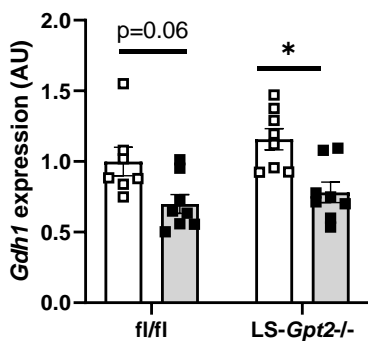

**E**

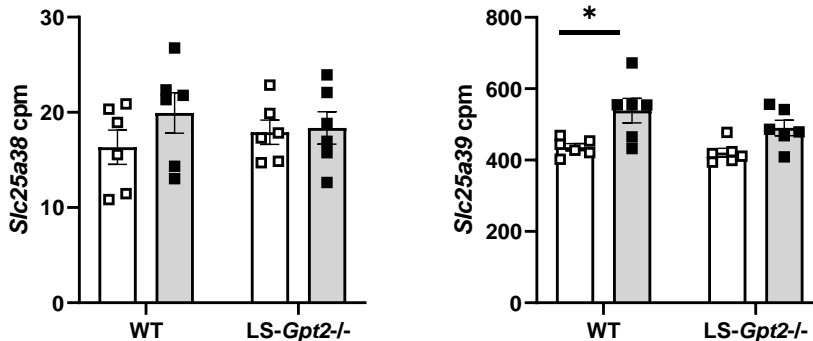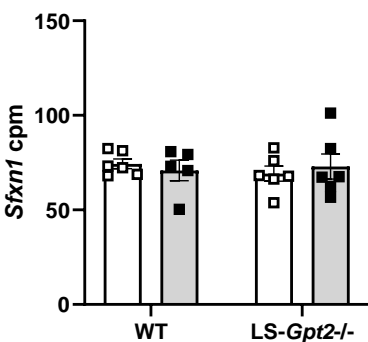

# Supplemental Figure 6

## A

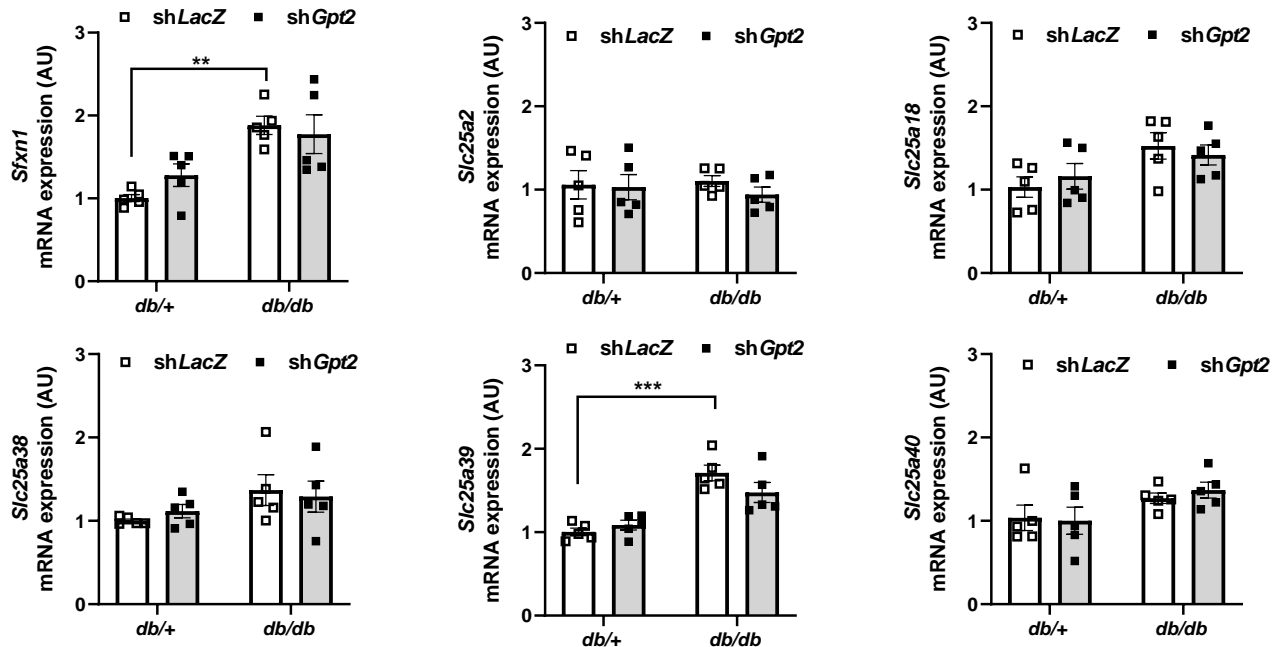

## B

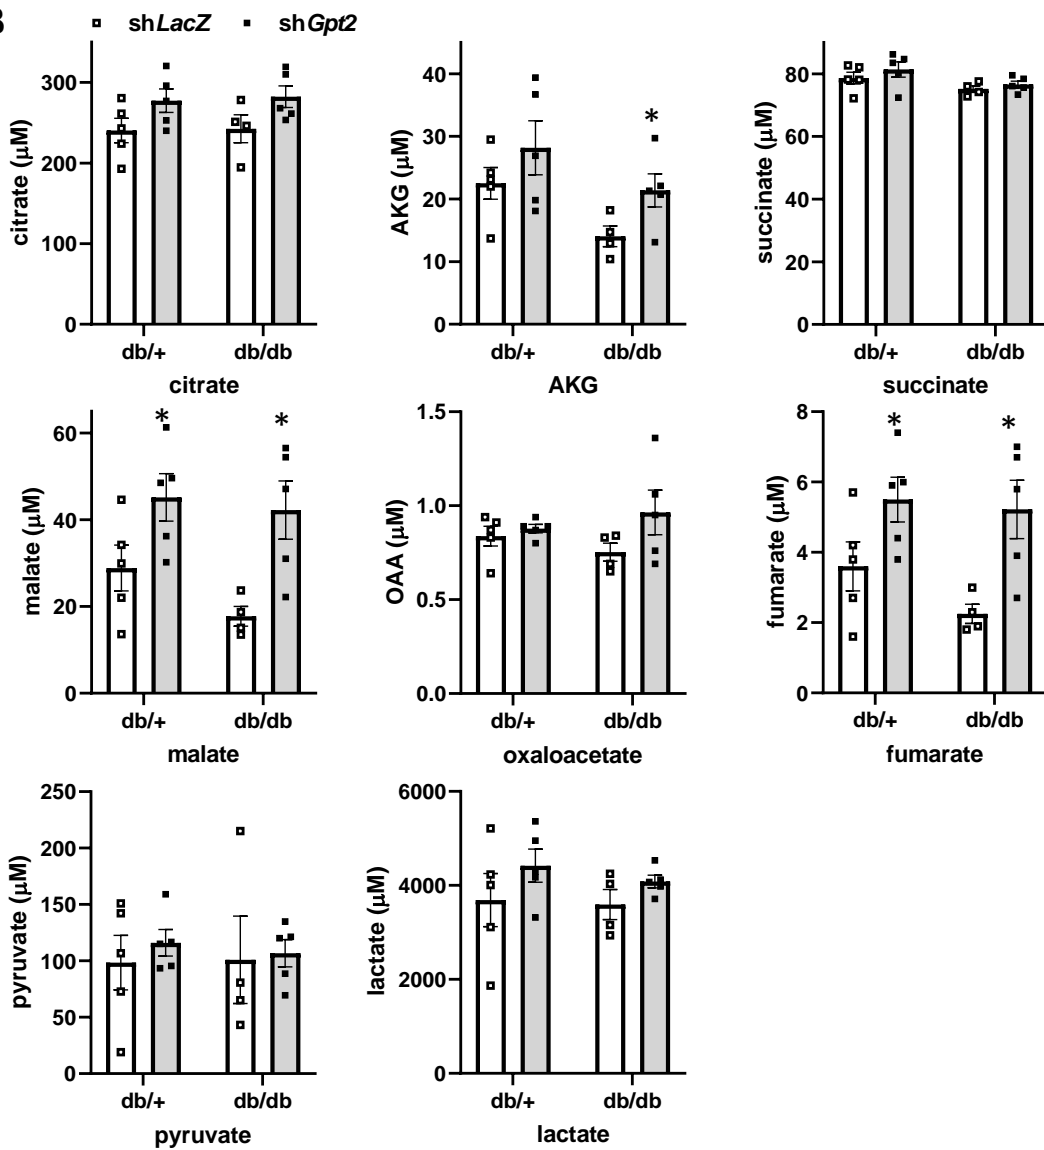

# Supplemental Figure 7

**A**

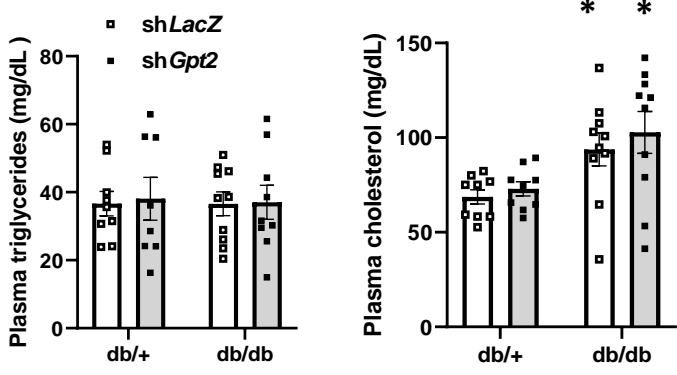

**B**

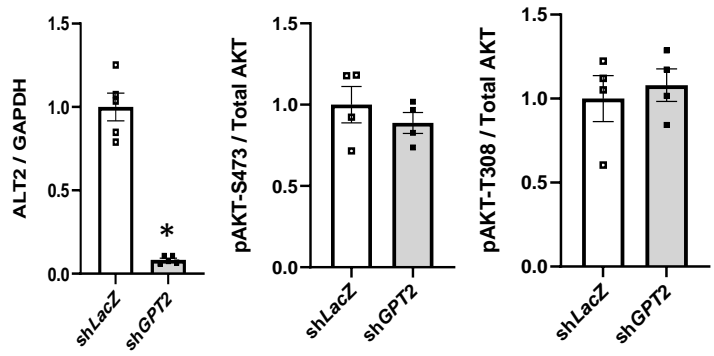

Supplement: NIHMS1801889-supplement-1.pdf [file NIHMS1801889-supplement-1.pdf]
